# Supplementary material for: Primary emissions of glyoxal and methylglyoxal from laboratorymeasurements of open biomass burning
Source: Copernicus journal article supplement (doi:10.5194/acp-2018-521), 2018-06-13
Supplement: Supplementary file 1 [file acp-2018-521-supplement.zip]

# Supplement to: Primary emissions of glyoxal and methylglyoxal from laboratory measurements of open biomass burning

Kyle J. Zarzana<sup>1,2,\*</sup>, Vanessa Selimovic<sup>3</sup>, Abigail R. Koss<sup>1,2,4,\*\*</sup>, Kanako Sekimoto<sup>1,2,5</sup>, Matthew M. Coggon<sup>1,2</sup>, Bin Yuan<sup>1,2,\*\*\*</sup>, William P. Dubé<sup>1,2</sup>, Robert J. Yokelson<sup>3</sup>, Carsten Warneke<sup>1,2</sup>, Joost A. de Gouw<sup>1,2,4</sup>, James M. Roberts<sup>1</sup>, and Steven S. Brown<sup>1,4</sup>

<sup>1</sup>NOAA Earth System Research Laboratory (ESRL) Chemical Sciences Division, Boulder, CO 80305, USA

<sup>2</sup>Cooperative Institute for Research in Environmental Sciences, University of Colorado Boulder, Boulder, CO 80309, USA

<sup>3</sup>Department of Chemistry and Biochemistry, University of Montana, Missoula, MT 59812, USA

<sup>4</sup>Department of Chemistry and Biochemistry, University of Colorado Boulder, Boulder, CO 80309, USA

<sup>5</sup>Graduate School of Nanobioscience, Yokohama City University, Yokohama, Kanagawa 236-0027, Japan

\* now at: Department of Chemistry and Biochemistry, University of Colorado Boulder, Boulder, CO 80309, USA

\*\* now at: Department of Civil and Environmental Engineering, Massachusetts Institute of Technology, Cambridge, MA 02142, USA

\*\*\* now at: Institute of Environment and Climate Research, Jinan University, Guangzhou 510632, China

**Correspondence:** S. S. Brown (Steven.S.Brown@noaa.gov)

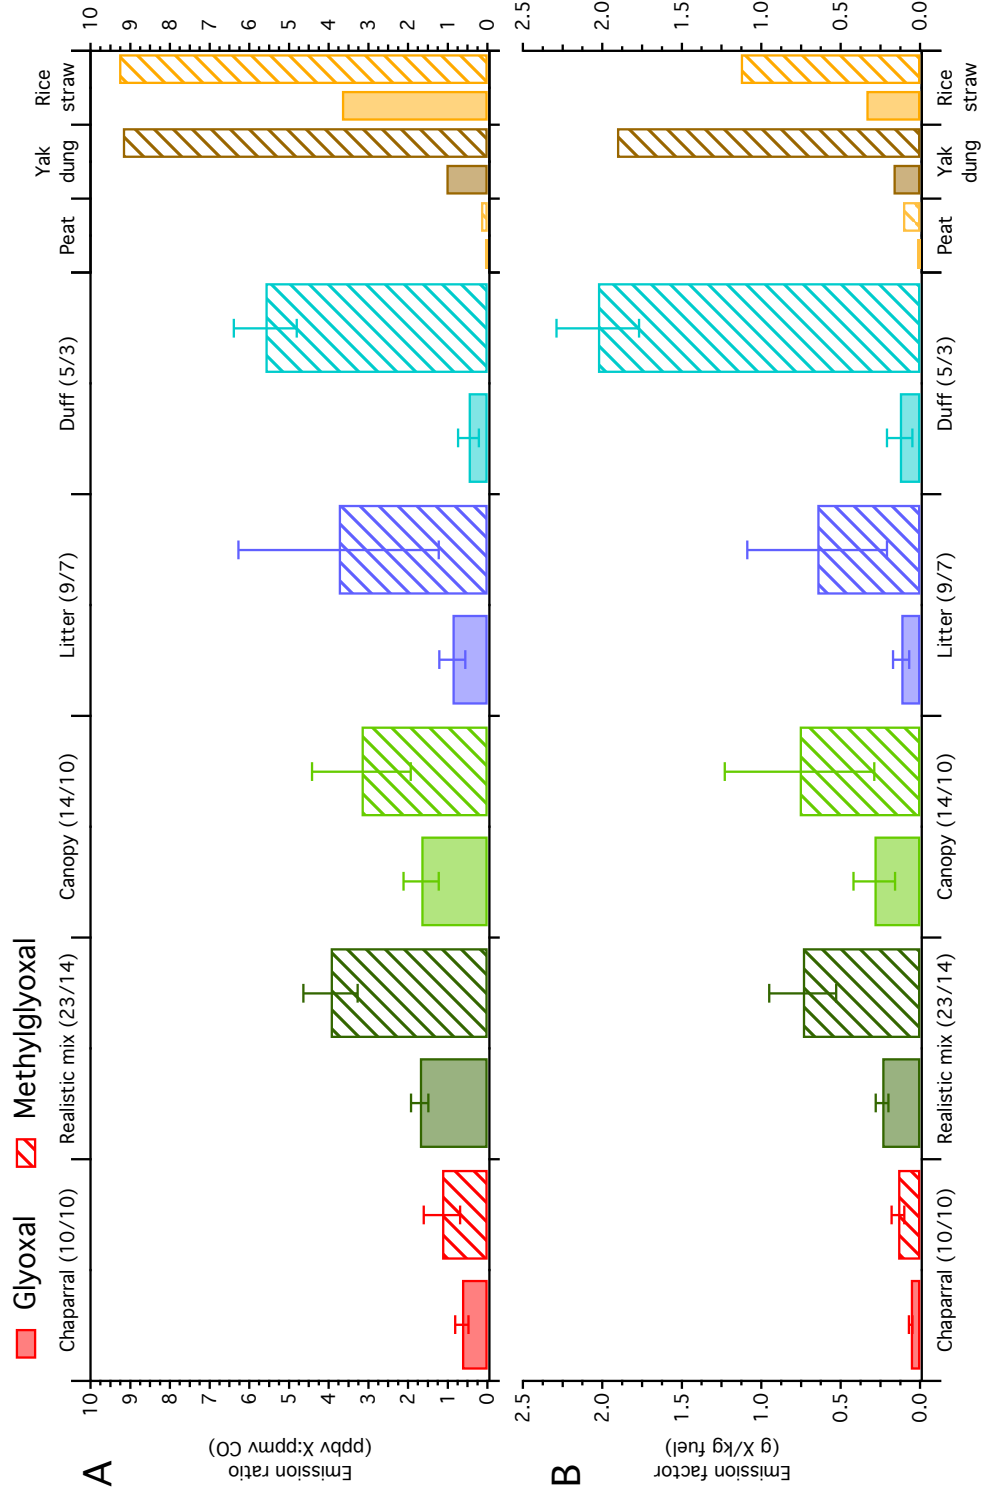

**Figure S1.** Emission ratios (A) and factors (B) for glyoxal (solid bars) and methylglyoxal (striped bars) from the five main fuel groups (chaparral, realistic coniferous mixes, conifer canopy, conifer litter, and conifer duff) and select other fuels. The numbers in parentheses after the fuel type are the number of burns for that fuel type for glyoxal and methylglyoxal respectively. Only one burn each was conducted for peat, yak dung, rice straw, and bear grass.

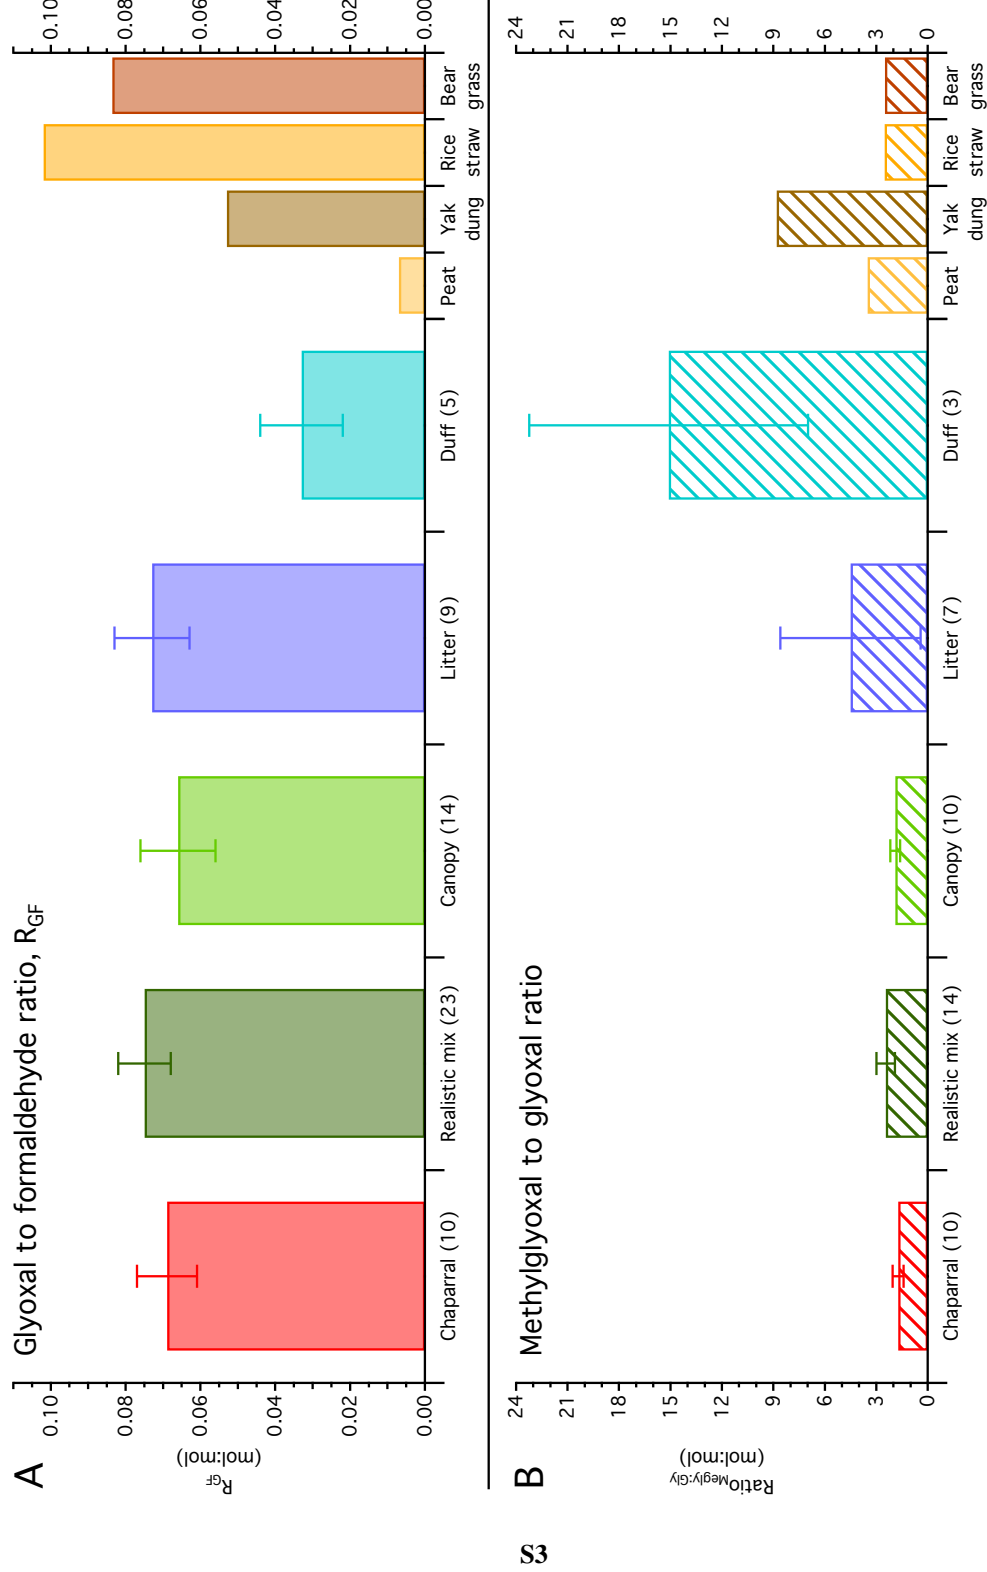

**Figure S2.**  $R_{GF}$  using formaldehyde data from the OP-FTIR (A) and methylglyoxal to glyoxal ratios (B) for the same fuels as in Fig. S1.
